# Supplementary material for: Development of strong and high-barrier food packaging films from cyclic-anhydride modified bacterial cellulose
Source: Royal Society of Chemistry journal article supplement (doi:10.1039/d3su00219e), 2023-10-23
Supplement: d3su00219e1.pdf [file d3su00219e1.pdf]

*Supplementary information*

**Development of Strong and High-Barrier Food Packaging Films from  
Cyclic-Anhydride Modified Bacterial Cellulose**

Zhuolun Jiang, Ka Man Cheung, To Ngai \*

*Department of Chemistry, the Chinese University of Hong Kong (CUHK), Shatin, N.T., Hong  
Kong, China*

*\* Corresponding Author*

*\* E-mail address: tongai@cuhk.edu.hk*

**Table S1**

Dry and wet TS of the pristine BC film and anhydride modified films at 70 °C for 5 min

| Properties    | BC           | DSA/DMSO (w/w) |              |              |              |              | OSA/DMSO (w/w) |               |              | ODSA/DMSO (w/w) |              |              | MA/DMSO (w/w) |               |              |
|---------------|--------------|----------------|--------------|--------------|--------------|--------------|----------------|---------------|--------------|-----------------|--------------|--------------|---------------|---------------|--------------|
|               |              | 0.03           | 0.05         | 0.1          | 0.15         | 0.2          | 0.03           | 0.05          | 0.1          | 0.1             | 0.15         | 0.2          | 0.01          | 0.03          | 0.05         |
| TS (MPa, dry) | 28.2<br>±1.5 | 49.5<br>±3.3   | 66.3<br>±5.1 | 83.5<br>±4.5 | 83.3<br>±3.5 | 35.1<br>±2.6 | 3.1<br>±0.4    | 110.7<br>±3.5 | 88.6<br>±3.5 | 45.0<br>±2.3    | 53.6<br>±3.2 | 22.9<br>±3.4 | 43.5<br>±1.1  | 133.4<br>±3.3 | 36.9<br>±3.5 |
| TS (MPa, wet) | -            | 0.5<br>±0.2    | 3.2<br>±0.6  | 15.8<br>±1.2 | 11.5<br>±2.1 | 30.1<br>±3.3 | 0.6<br>±0.1    | 0.5<br>±0.1   | 0.7<br>±0.1  | 5.2<br>±0.3     | 5.6<br>±0.2  | 0.7<br>±0.2  | 13.7<br>±1.2  | 22.5<br>±1.9  | 25.4<br>±2.1 |

**Table S2**

Chemical compositions of the pristine BC and anhydride modified films at 10 min–3 h

| Atom (wt %) | BC             | 3%C0-BC        |                |                |                | 5%C8-BC        |                |                |                | 10%C12-BC      |                |                |                | 15%C18-BC      |                |                |                |
|-------------|----------------|----------------|----------------|----------------|----------------|----------------|----------------|----------------|----------------|----------------|----------------|----------------|----------------|----------------|----------------|----------------|----------------|
|             |                | 10 min         | 30 min         | 1 h            | 3 h            | 10 min         | 30 min         | 1 h            | 3 h            | 10 min         | 30 min         | 1 h            | 3 h            | 10 min         | 30 min         | 1 h            | 3 h            |
| C           | 46.39<br>±0.29 | 49.97<br>±0.16 | 49.68<br>±0.18 | 49.79<br>±0.22 | 50.19<br>±0.24 | 51.07<br>±0.20 | 52.16<br>±0.23 | 52.65<br>±0.25 | 52.75<br>±0.23 | 50.23<br>±0.17 | 50.68<br>±0.27 | 50.81<br>±0.19 | 51.73<br>±0.26 | 49.70<br>±0.16 | 51.88<br>±0.23 | 53.36<br>±0.24 | 54.56<br>±0.28 |
| O           | 53.49<br>±0.33 | 48.93<br>±0.21 | 49.43<br>±0.12 | 49.13<br>±0.15 | 49.18<br>±0.19 | 47.60<br>±0.16 | 45.91<br>±0.15 | 45.85<br>±0.18 | 46.00<br>±0.16 | 48.94<br>±0.11 | 48.30<br>±0.13 | 48.02<br>±0.12 | 46.90<br>±0.15 | 50.12<br>±0.20 | 46.14<br>±0.17 | 45.34<br>±0.13 | 43.69<br>±0.12 |
| S           | 0.12<br>±0.02  | 1.09<br>±0.05  | 0.88<br>±0.10  | 1.08<br>±0.04  | 0.63<br>±0.07  | 1.33<br>±0.09  | 1.93<br>±0.10  | 1.47<br>±0.05  | 1.26<br>±0.10  | 0.83<br>±0.07  | 1.03<br>±0.06  | 1.17<br>±0.03  | 1.37<br>±0.07  | 0.19<br>±0.03  | 1.98<br>±0.06  | 1.30<br>±0.07  | 1.75<br>±0.08  |

**Table S3**

Mechanical strength of the pristine BC film and anhydride modified films at 10 min–3 h

| Properties    | BC           | 3%C0-BC      |              |              |              | 5%C8-BC      |               |              |              | 10%C12-BC    |               |              |              | 15%C18-BC    |               |               |              |
|---------------|--------------|--------------|--------------|--------------|--------------|--------------|---------------|--------------|--------------|--------------|---------------|--------------|--------------|--------------|---------------|---------------|--------------|
|               |              | 10 min       | 30 min       | 1 h          | 3 h          | 10 min       | 30 min        | 1 h          | 3 h          | 10 min       | 30 min        | 1 h          | 3 h          | 10 min       | 30 min        | 1 h           | 3 h          |
| TS (MPa, dry) | 28.2<br>±1.5 | 87.8<br>±2.6 | 89.5<br>±2.6 | 49.9<br>±3.8 | 58.9<br>±3.5 | 88.8<br>±3.7 | 116.6<br>±2.3 | 66.1<br>±9.9 | 66.4<br>±3.1 | 84.6<br>±2.8 | 124.3<br>±2.1 | 93.3<br>±2.5 | 48.1<br>±3.1 | 49.7<br>±3.8 | 110.4<br>±2.9 | 116.3<br>±3.5 | 91.2<br>±4.0 |
| EAB (% dry)   | 13.6<br>±0.1 | 7.7<br>±0.6  | 7.3<br>±0.4  | 3.8<br>±0.3  | 5.3<br>±0.4  | 10.0<br>±1.1 | 13.7<br>±2.0  | 8.6<br>±1.5  | 10.4<br>±1.0 | 12.9<br>±0.6 | 20.1<br>±0.5  | 10.3<br>±0.9 | 5.1<br>±1.0  | 4.8<br>±0.5  | 11.4<br>±1.2  | 12.2<br>±0.3  | 10.1<br>±0.6 |
| TS (MPa, wet) | -            | 16.5<br>±1.8 | 23.0<br>±1.5 | 75.4<br>±3.3 | 48.1<br>±2.2 | 7.4<br>±1.4  | 58.8<br>±3.7  | 53.9<br>±4.0 | 30.9<br>±3.1 | 37.5<br>±1.1 | 81.0<br>±1.7  | 75.7<br>±3.1 | 22.7<br>±3.1 | 15.1<br>±1.2 | 25.3<br>±1.9  | 71.4<br>±4.1  | 73.6<br>±3.3 |
| EAB (% wet)   | -            | 2.6<br>±0.2  | 4.6<br>±0.3  | 13.5<br>±0.5 | 8.9<br>±0.5  | 2.8<br>±0.3  | 26.4<br>±2.2  | 16.6<br>±1.5 | 9.6<br>±0.5  | 15.4<br>±1.7 | 15.0<br>±0.8  | 17.5<br>±0.9 | 5.8<br>±0.5  | 7.0<br>±0.4  | 7.9<br>±0.4   | 17.8<br>±0.6  | 13.9<br>±1.6 |

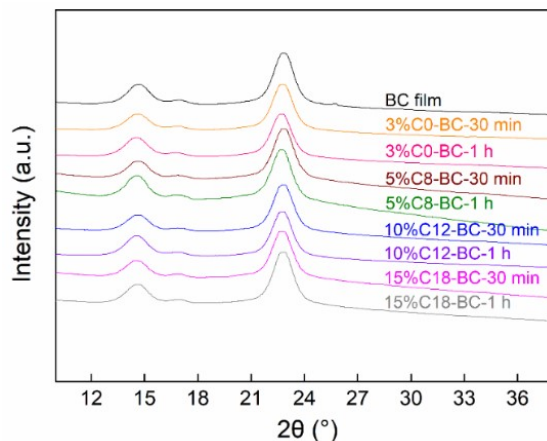

**Figure S1.** XRD of the pristine BC and 3%C0, 5%C8, 10%C12, 15%C18-30 min, 1 h films.

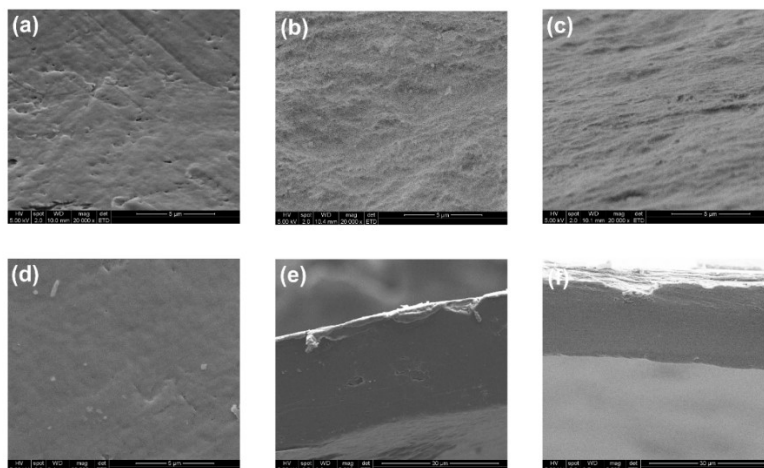

**Figure S2.** SEM images (cross-section) of (a) 3%C0-BC-1 h, (b) 5%C8-BC-1 h, (c) 10%C12-BC-1 h, (d) C15-BC-1 h at 20,000 $\times$ , and (e) the pristine BC, (f) 5%C8-BC-1 h at 5,000 $\times$ .

**Table S4**

Water resistance of the pristine BC and anhydride modified BC films at 10 min–3 h

| Water resistance                                                     | BC         | 3%C0-BC    |            |            |            | 5%C8-BC    |            |            |            | 10%C12-BC  |            |            |            | 15%C18-BC  |            |            |            |
|----------------------------------------------------------------------|------------|------------|------------|------------|------------|------------|------------|------------|------------|------------|------------|------------|------------|------------|------------|------------|------------|
|                                                                      |            | 10 min     | 30 min     | 1 h        | 3 h        | 10 min     | 30 min     | 1 h        | 3 h        | 10 min     | 30 min     | 1 h        | 3 h        | 10 min     | 30 min     | 1 h        | 3 h        |
| WCA, 1 s ( $^{\circ}$ )                                              | 64         | 73         | 78         | 76         | 81         | 93         | 96         | 88         | 92         | 82         | 96         | 97         | 101        | 93         | 96         | 103        | 104        |
|                                                                      | $\pm 2$    | $\pm 3$    | $\pm 3$    | $\pm 1$    | $\pm 2$    | $\pm 3$    | $\pm 2$    | $\pm 1$    | $\pm 2$    | $\pm 3$    | $\pm 2$    | $\pm 3$    | $\pm 2$    | $\pm 3$    | $\pm 2$    | $\pm 2$    | $\pm 2$    |
| WCA, 5 min ( $^{\circ}$ )                                            | 18         | 47         | 52         | 54         | 54         | 78         | 83         | 71         | 75         | 52         | 70         | 76         | 78         | 77         | 83         | 90         | 89         |
|                                                                      | $\pm 2$    | $\pm 3$    | $\pm 2$    | $\pm 1$    | $\pm 2$    | $\pm 3$    | $\pm 1$    | $\pm 3$    | $\pm 3$    | $\pm 3$    | $\pm 2$    | $\pm 3$    | $\pm 2$    | $\pm 2$    | $\pm 3$    | $\pm 2$    | $\pm 1$    |
| WS (%)                                                               | -          | 18.2       | 9.5        | 8.3        | 4.4        | 45.8       | 25.7       | 21.2       | 5.7        | 56.5       | 40.0       | 39.1       | 26.7       | 27.8       | 19.2       | 16.7       | 15.8       |
|                                                                      |            | $\pm 1.3$  | $\pm 0.7$  | $\pm 0.5$  | $\pm 0.5$  | $\pm 2.2$  | $\pm 1.9$  | $\pm 0.7$  | $\pm 0.3$  | $\pm 2.3$  | $\pm 2.1$  | $\pm 1.2$  | $\pm 1.3$  | $\pm 1.2$  | $\pm 0.4$  | $\pm 0.8$  | $\pm 1.3$  |
| WVP ( $\times 10^{-10}$ g $\cdot$ m $^{-1}$ ·s $^{-1}$ ·pa $^{-1}$ ) | 3.11       | 2.43       | 2.48       | 2.84       | 2.21       | 2.93       | 1.92       | 1.46       | 1.26       | 2.82       | 2.35       | 2.47       | 2.10       | 2.53       | 1.89       | 1.03       | 1.57       |
|                                                                      | $\pm 0.08$ | $\pm 0.07$ | $\pm 0.06$ | $\pm 0.07$ | $\pm 0.06$ | $\pm 0.11$ | $\pm 0.06$ | $\pm 0.05$ | $\pm 0.09$ | $\pm 0.07$ | $\pm 0.11$ | $\pm 0.16$ | $\pm 0.09$ | $\pm 0.10$ | $\pm 0.17$ | $\pm 0.10$ | $\pm 0.15$ |

**Table S5**

WVP of 10%C8-BC-10 min–3 h and 15%C8-BC-10 min–3 h at 30 °C, 75%

| Property                                                                          | 10%C8-BC      |               |               |               | 15%C8-BC      |               |               |               |
|-----------------------------------------------------------------------------------|---------------|---------------|---------------|---------------|---------------|---------------|---------------|---------------|
|                                                                                   | 10 min        | 30 min        | 1 h           | 3 h           | 10 min        | 30 min        | 1 h           | 3 h           |
| WVP<br>( $\times 10^{-10}$ g·m <sup>-1</sup> ·s <sup>-1</sup> ·pa <sup>-1</sup> ) | 1.16<br>±0.03 | 0.87<br>±0.02 | 0.51<br>±0.03 | 0.92<br>±0.01 | 2.48<br>±0.02 | 2.39<br>±0.04 | 1.77<br>±0.06 | 1.06<br>±0.04 |

**Table S6**

Mechanical strength of 10%C8-BC-10 min–3 h

| Properties    | 10%C8-BC     |              |              |              |
|---------------|--------------|--------------|--------------|--------------|
|               | 10 min       | 30 min       | 1 h          | 3 h          |
| TS (MPa, dry) | 54.6<br>±2.5 | 95.1<br>±1.7 | 71.4<br>±3.3 | 62.6<br>±3.3 |
| EAB (% , dry) | 7.8<br>±0.5  | 15.4<br>±0.5 | 11.3<br>±0.5 | 10.7<br>±0.8 |
| TS (MPa, wet) | 25.2<br>±2.1 | 52.8<br>±3.9 | 37.8<br>±3.0 | 59.8<br>±3.6 |
| EAB (% , wet) | 9.3<br>±0.4  | 15.6<br>±0.5 | 12.4<br>±0.9 | 10.5<br>±0.8 |

**Table S7**

Mechanical strength of 15%C8-BC-10 min–3 h

| Properties    | 10%C8-BC     |              |              |              |
|---------------|--------------|--------------|--------------|--------------|
|               | 10 min       | 30 min       | 1 h          | 3 h          |
| TS (MPa, dry) | 46.2<br>±2.8 | 59.0<br>±2.8 | 35.9<br>±4.7 | 48.4<br>±3.0 |
| EAB (% , dry) | 4.7<br>±0.9  | 8.7<br>±0.5  | 3.4<br>±0.4  | 5.6<br>±0.6  |
| TS (MPa, wet) | 26.4<br>±4.0 | 35.5<br>±3.4 | 37.6<br>±4.9 | 41.8<br>±3.8 |
| EAB (% , wet) | 6.8<br>±0.5  | 10.1<br>±1.2 | 9.6<br>±0.5  | 10.3<br>±1.1 |

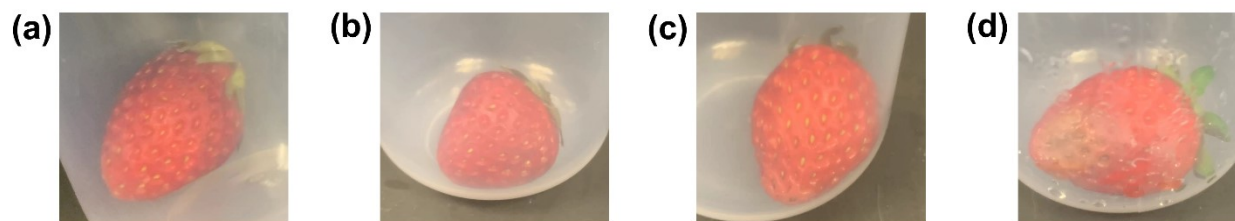**Figure S3.** The photographs of the strawberries covered by the (a) pristine BC, (b) 3%C0-BC-1 h, (c) 10%C8-BC-1 h, and (d) LDPE films after storing at 4 °C for 7 d.

**Table S8**

Weight loss (%) of the uncovered, and pristine BC/3%C0-BC-1 h/10%C8-BC-1 h/LDPE covered strawberries during storage in refrigerator for 1–7 d

| Samples              | Weight loss (%) |                |                |                |
|----------------------|-----------------|----------------|----------------|----------------|
|                      | 1 d             | 3 d            | 5 d            | 7 d            |
| uncovered            | 4.73<br>±0.16   | 12.91<br>±0.15 | 22.05<br>±0.21 | 36.44<br>±1.09 |
| BC film covered      | 2.10<br>±0.09   | 6.65<br>±0.10  | 11.13<br>±0.11 | 20.07<br>±0.40 |
| 3%C0-BC-1 h covered  | 2.03<br>±0.07   | 6.33<br>±0.18  | 16.22<br>±0.26 | 16.09<br>±0.10 |
| 10%C8-BC-1 h covered | 1.14<br>±0.12   | 3.59<br>±0.18  | 5.77<br>±0.13  | 9.04<br>±0.19  |
| LDPE film            | 1.01<br>±0.04   | 3.13<br>±0.07  | 4.85<br>±0.07  | 7.88<br>±0.26  |

**Table S9**

| Properties            | BC  | 3%C0-BC |        |     |     | 5%C8-BC |        |     |     | 10%C12-BC |        |     |     | 15%C18-BC |        |     |     |
|-----------------------|-----|---------|--------|-----|-----|---------|--------|-----|-----|-----------|--------|-----|-----|-----------|--------|-----|-----|
|                       |     | 10 min  | 30 min | 1 h | 3 h | 10 min  | 30 min | 1 h | 3 h | 10 min    | 30 min | 1 h | 3 h | 10 min    | 30 min | 1 h | 3 h |
| T <sub>max</sub> (°C) | 338 | 370     | 361    | 364 | 357 | 349     | 371    | 369 | 364 | 360       | 371    | 370 | 362 | 364       | 367    | 369 | 363 |

Thermal stability of the pristine BC and 3%C0, 5%C8, 10%C12, 15%C18-BC-10 min–3 h
